# Supplementary material for: The Impact of Over-The-Counter Lactic Acid Containing Vaginal Gels on the Integrity and Inflammatory State of the Vaginal Epithelium in vitro
Source: Front Reprod Health. 2022 Jun 23;4:915948. doi: 10.3389/frph.2022.915948 (PMC9580709; doi:10.3389/frph.2022.915948)
Supplement: Supplementary file 1 [file Table_1.XLSX]

## Sheet: TEER
	TEER (% of untreated)
	4 hr Exposure					24hr Exposure
	Run #1*		Run #2*			Run #1*		Run #2*
Treatment	% TEER	CV%	% TEER	CV%		% TEER	CV%	% TEER	CV%
Untreated	100	0.83	100	18.64		100	21.55	100	6.89
Positive control (Gynol II)	17.8628	18.94	28.6164	4.15		17.2471	9.27	27.4621	3.16
Placebo (HEC)	107.656	25.14	93.239	2.04		118.574	5.01	84.4697	8.08
Lactigel	20.7337	29.37	28.7736	12.38		21.2272	5.9	31.8182	3.09
Relactagel	16.5869	NA	31.761	5.62		19.2371	2.99	30.8712	4.25
Balance Activ	33.9713	16.24	32.0755	0		19.9005	2.5	30.8712	4.25
Gynofit	9.09091	NA	29.8742	21.44		19.5688	6.4	30.4924	3.88
Canesbalance	31.26	10.75	32.8616	2.19		19.403	5.13	32.7652	5.01
Geliofil Classic	27.2727	3.51	31.4465	5.27		19.403	5.13	32.3864	5.26
Caya Diaphragm gel	19.6172	32.77	28.9308	8.37		21.7247	3.5	32.0076	2.05
Fleurstat	149.442	78.52	47.7987	29.89		99.1708	13.09	39.7727	8.69
Restore	100.797	8.14	99.6855	21.22		53.5655	34.97	77.6515	66.11
Aci-jel	33.9713	28.9	39.1509	30.74		19.9005	5	32.9545	8.96
Contragel	29.3461	10.61	29.4025	6.48		21.8905	2.27	32.9545	1.72
Average CV		21.9767		12.0307			8.765		9.38571
* Average TEER for each run shown is derived from n=3 individual tissue replicates per assay.

## Sheet: Viability
	Viability (% of untreated)
	4 hr exposure		4 hr exposure			24 hr exposure		24 hr exposure
	Run #1		Run #2			Run #1		Run #2
Treatment	% Viability	CV%	% Viability	CV%		% Viability	CV%	% Viability	CV%
Untreated	100	7.10458	100	0.996672		100	2.76557	100	7.37969
Positive control (Gynol II)	58.1043	5.54502	62.2132	2.09937		4.78519	0.356172	3.15297	0.1363
Placebo (HEC)	90.4858	1.85993	103.809	1.8449		75.7926	4.8607	68.4566	1.16829
Lactigel	6.51659	4.15551	8.03719	0.55135		3.92593	0.523783	5.06678	0.233658
Relactagel	4.27725	2.96583	7.24247	0.106029		7.77778	1.94847	6.0168	0.0973574
Balance Activ	6.77725	0.30161	7.54236	0.275675		6.1037	0.209513	4.50227	1.10987
Gynofit	12.6777	8.00941	27.8902	8.90643		8.1037	1.90657	5.93419	1.69402
Canesbalance	9.08768	3.53553	6.05788	0.127235		6.13333	0.628539	5.31461	0
Geliofil Classic	6.1019	0.38539	6.70265	0.530145		6.85926	0.900906	5.31461	1.59666
Caya Diaphragm gel	4.51422	1.89344	6.68766	0.0848231		7.40741	0.293318	6.42985	0.253129
Fleurstat	65.7109	4.25605	86.4597	6.40415		85.0667	2.55606	55.6657	1.03199
Restore	79.455	4.39009	76.4732	10.8574		52.6074	9.15572	51.4388	9.38525
Aci-jel	25.2607	7.23863	26.6457	8.67316		5.83704	1.04757	4.58488	0.759388
Contragel	5.80569	0.167561	7.4224	0.106029		7.02222	0.460929	5.87911	0.720445
Average CV%		3.70061		2.96881			1.97242		1.82615
* Average viability for each run shown is derived from n=3 individual tissue replicates per assay.
